# Supplementary material for: FAK inhibition alone or in combination with adjuvant therapies reduces cancer stem cell activity
Source: PubMed Central journal article supplement (PMC8163772; doi:10.1038/s41523-021-00263-3), 2021-05-28
Supplement: 41523_2021_263_MOESM1_ESM.pdf [file 41523_2021_263_MOESM1_ESM.pdf]

**Supplementary table 1: Overview of the literature evaluating FAK expression in breast cancer.**

| Author            | Method                                     | Cohort details                                                                                 | High Expression Criteria                                                              | Prognostic outcome                                                                                     | Association                                    | Comments                                                           |
|-------------------|--------------------------------------------|------------------------------------------------------------------------------------------------|---------------------------------------------------------------------------------------|--------------------------------------------------------------------------------------------------------|------------------------------------------------|--------------------------------------------------------------------|
| Almstedt 2017     | IHC - FAK<br>CST 1:100                     | German cohort.<br>335 lymph node negative patients.43 local recurrences, 75 distant metastases | Modified Allred $\geq 6$ (45.1%)<br>22.4% had 3+ intensity expression                 | Recurrence risk HR <b>1.54</b> (1.04- 2.28)<br>Uni,p=0.03<br><b>HR1.28</b> (0.85- 1.92) Multi, p=0.244 | Particularly prognostic in ER- /HER2+ve        | Lymph node negative only Mainly ER+/HER2- (234)                    |
| Golubovskaya 2014 | IHC -FAK<br>4.47 clone                     | US cohort 196 patients of whom 117 metastasised                                                | >4 - Each core scored as 0-3 based on intensity and number of positive cores counted. | Reduced breast cancer survival. 44 months vs 123months (p=0.003)                                       | Young Age LVI Triple Negative                  | High FAK in metastatic tissues is associated with reduced survival |
| Yom 2011          | IHC -FAK<br>4.47 clone<br><br>FISH         | South Korean 242 patients<br><br>393 patients                                                  | 3+ intensity in $\geq 20\%$ epithelial cells                                          | Breast cancer death HR <b>1.38</b> (0.7-2.72)<br>p=0.36 HR <b>3.62</b> (1.817.25)<br>p=<0.001          | Triple Negative, p53, Ki67 Correlates with IHC | FISH positivity is associated with reduced survival.               |
| Alexopolou 2014   | IF - FAK<br>4.47 clone<br>Conjugated 546nm | UK cohort 149 samples                                                                          | Automated fluorescence analysis                                                       | No clinical follow up                                                                                  | Triple Negative High Grade ER negativity       |                                                                    |
| Lark 2005         | IHC -FAK<br>4.47 clone 1:250               | US cohort 629 patients                                                                         | 3+ or 4+ intensity in $\geq 90\%$ of epithelial cells.                                | No clinical follow up                                                                                  | High grade. ER negative HER2 positive          |                                                                    |
| Schmitz 2004      | IHC -FAK<br>Santa Cruz 1:100               | 162 – node negative<br>19 breast cancer deaths                                                 | 3+ intensity in $\geq 20\%$ of epithelial cells                                       | Not given                                                                                              | High grade ER negative HER2 positive           | Associated with Akt 22.5% -3+                                      |
| Lightfoot 2004    | IHC - FAK<br>4.47 1:250                    | 50 Benign<br>51 DCIS<br>18 IDC                                                                 | 3 or 4+ intensity $\geq 90\%$ epithelium                                              | No clinical follow up.                                                                                 | Higher expression in DCIS/IDC                  |                                                                    |
| Williams 2015     | IHC - pTyr397FAK 44-624G<br><br>FAK 4.47   | 63 DCIS samples<br>21 recurrences                                                              | $\geq 90\%$ 2 or 3+ intensity                                                         | Risk of recurrence HR <b>3.44</b> (1.189.31)<br>p=0.015 FAK-<br>No association with prognosis          | Recurrence in DCIS.                            | DCIS only                                                          |
| Sheen-Chen 2013   | IHC - pTyr397FAK ab4803 1:100              | 98<br>Recurrence number not stated                                                             | 3+ intensity                                                                          | Breast Cancer Death HR 1.3 p=0.474                                                                     | Not associated with survival in IDC.           |                                                                    |

IHC = Immunohistochemical analysis, CST = Cell Signalling Technologies, FAK= Total FAK, FISH

= Fluorescent In Situ Hybridisation, IF – Immunofluorescence, pFAK = pTyr397FAK

**Supplementary table 2: Clinical and pathological characteristics in IDC cohort.**

| <b>Variable</b>             | <b>Categories</b> | <b>Number (%)</b>  | <b>Recurrence<br/>(n=89)</b> | <b>Non-<br/>Recurrence<br/>(n=155)</b> | <b>p-value</b>     |
|-----------------------------|-------------------|--------------------|------------------------------|----------------------------------------|--------------------|
| <b>Age (years)</b>          | Median (IQR)      | 244                | 58 (47-69.5)                 | 57 (49-67)                             | 0.605*             |
| <b>Tumour Size (mm)</b>     | Median (IQR)      | 242                | 25 (16-38.5)                 | 20 (13-34)                             | 0.132*             |
| <b>Surgery</b>              | WLE               | <b>57.4%</b> (140) | <b>51.6%</b> (46)            | <b>60.6%</b> (94)                      | 0.150**            |
|                             | Mastectomy        | <b>42.6%</b> (104) | <b>48.3%</b> (43)            | <b>39.4%</b> (61)                      |                    |
| <b>Lymph node</b>           | Positive          | <b>40.5%</b> 99    | <b>57.3%</b> (51)            | <b>31.3%</b> (48)                      | <b>&lt;0.001**</b> |
|                             | Negative          | <b>58.6%</b> 143   | <b>42.7%</b> (38)            | <b>68.7%</b> (105)                     |                    |
|                             | Missing           | <b>0.9%</b> (2)    |                              |                                        |                    |
| <b>Excision Margin</b>      | Incomplete (<1mm) | <b>33.4%</b> (57)  | <b>13.5%</b> (12)            | <b>29%</b> (45)                        | <b>0.004**</b>     |
|                             | Complete (>1mm)   | <b>76.6%</b> (187) | <b>86.5%</b> (77)            | <b>71.0%</b> (110)                     |                    |
| <b>Tumour grade</b>         | 3                 | <b>66.7%</b> (162) | <b>70.8%</b> (63)            | <b>63.9%</b> (99)                      | 0.497**            |
|                             | 2                 | <b>25.8%</b> (63)  | <b>23.6%</b> (21)            | <b>27.1%</b> (42)                      |                    |
|                             | 1                 | <b>7.8%</b> (19)   | <b>5.6%</b> (5)              | <b>9.0%</b> (14)                       |                    |
| <b>Multifocality</b>        | Yes               | <b>17.6%</b> (43)  | <b>21.8%</b> (19)            | <b>15.6%</b> (24)                      | 0.199**            |
|                             | No                | <b>81.1%</b> (198) | <b>78.2%</b> (68)            | <b>86.4%</b> (130)                     |                    |
|                             | Missing           | <b>1.2%</b> (3)    |                              |                                        |                    |
| <b>Ki67 (%)</b>             | Median (IQR)      | 162                | 38 (25.4-66.5)               | 28 (12.5-46)                           | <b>0.025*</b>      |
| <b>Metastasis</b>           | Yes               | <b>23.4%</b> (57)  | <b>64.0%</b> (57)            | <b>0%</b> (0)                          | <b>&lt;0.001*</b>  |
|                             | No                | <b>76.7%</b> (157) | <b>36.0%</b> (32)            | <b>100%</b> (155)                      |                    |
| <b>Breast Cancer Deaths</b> | Yes               | <b>13.9%</b> (34)  | <b>38.2%</b> (34)            | <b>0%</b> (0)                          | <b>&lt;0.001*</b>  |
|                             | No                | <b>86.1%</b> (210) | <b>61.8%</b> (55)            | <b>100%</b> (155)                      |                    |

Continuous variables were compared using the independent samples t-test\* and categorical data was analysed using the Pearson Chi square test\*\*.

**Supplementary Figure 1: Isolation of ALDH+ epithelial cells and ALDH sorting gates.**

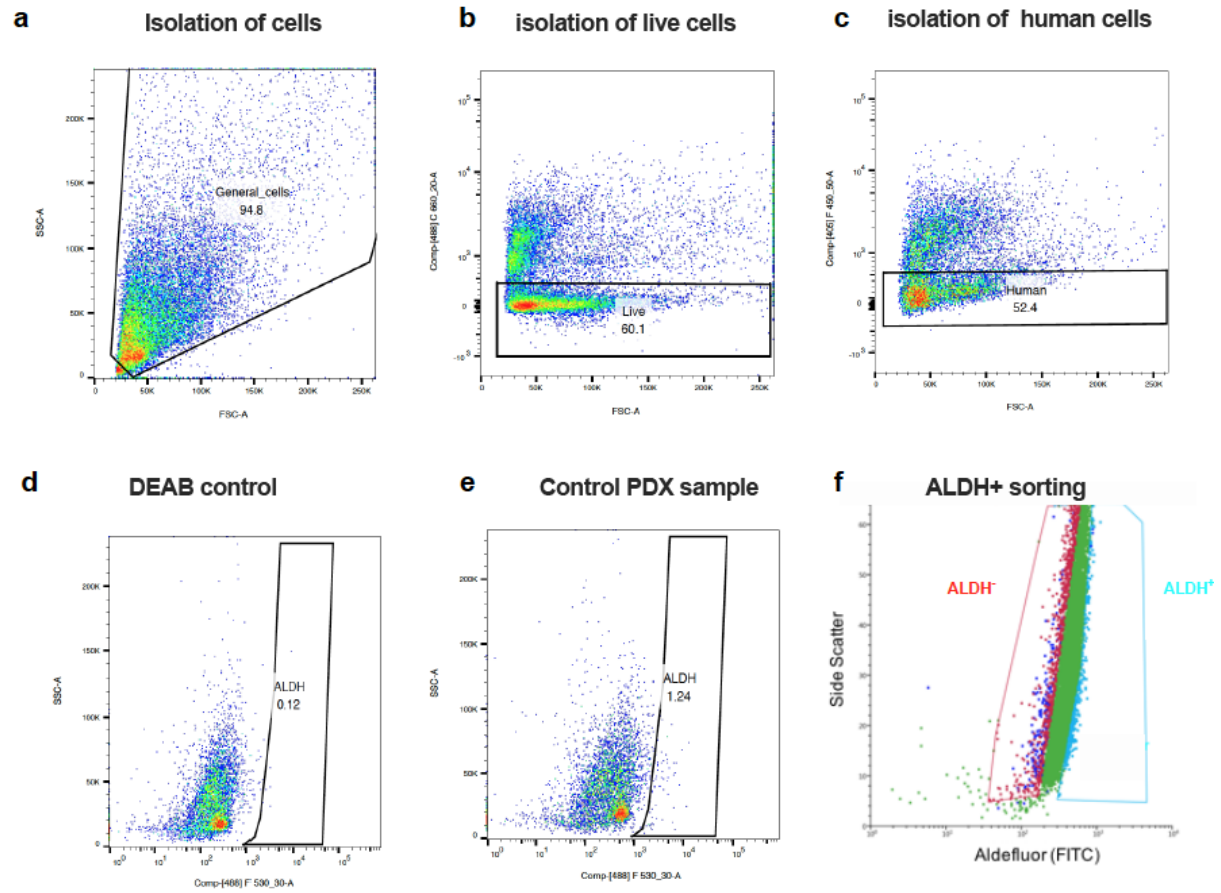

FACS plots demonstrating the identification of epithelial staining of ALDH was identified in PDX models and flow sort experiment. **(a)** General cells were selected, then **(b)** live cells isolated using 7AAD. **(c)** Mouse cells were then excluded using H2KD. For the Aldefluor assay the **(d)** DEAB control was set at 0.1% with an illustrative FACS plot of ALDH+ expression in mouse receiving control only. Shown in **(e)**. **(f)** Flow cytometry plot demonstrating the gating used to isolate the ALDH+ and ALDH- populations. ALDH+ was selected against a 0.1% DEAB control and the bottom 20% of ALDH expression identified as ALDH- expression.

**Supplementary Figure 2: Pharmacological FAK inhibition and SiRNA knockdown reduces CSC activity in SUM159 cells.**

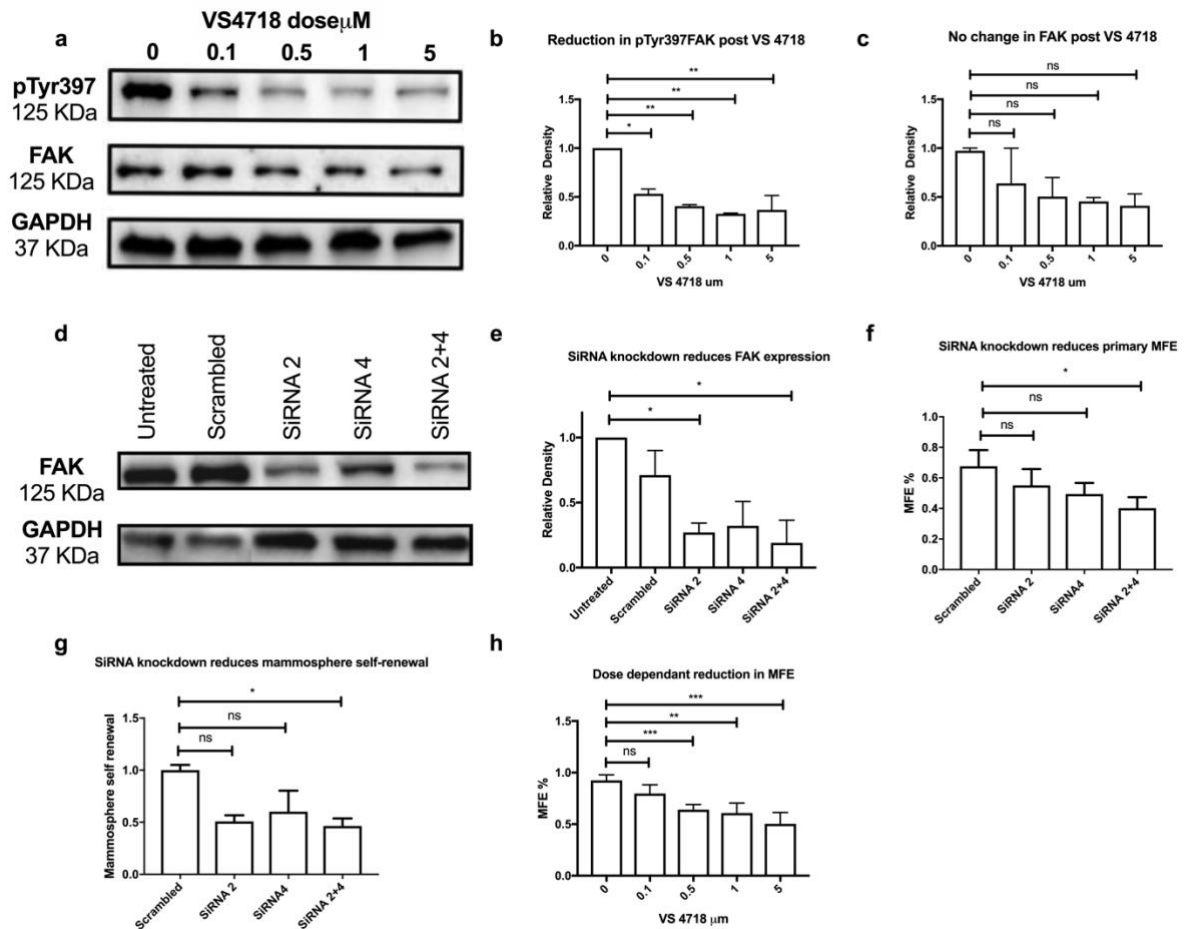

**(a)** Representative western blot demonstrating pharmacological FAK inhibition with VS4718 resulted in a dose dependent reduction in pTyr397FAK with relative protein expression shown in **(b)** but not **(c)** FAK (n=2). FAK knockdown using SiRNA resulted in a decrease in FAK expression as shown in the **(d)** western blot with **(e)** relative density plot. This reduction in FAK correlated with a reduction in **(f)** primary and **(g)** secondary sphere formation. **(h)** The dose dependent reduction in pTyr397FAK corresponded with a reduction in primary MFE. One-way ANOVA with post hoc Dunnett's test. (ns= not significant, \*p<0.05, \*\*p<0.01, \*\*\*p<0.001, \*\*\*\*p<0.0001). All data n=3 unless otherwise stated and error bars are mean  $\pm$  SEM.

**Supplementary Figure 3: High FAK is associated with reduced breast cancer survival, increased risk of metastasis and recurrence.**

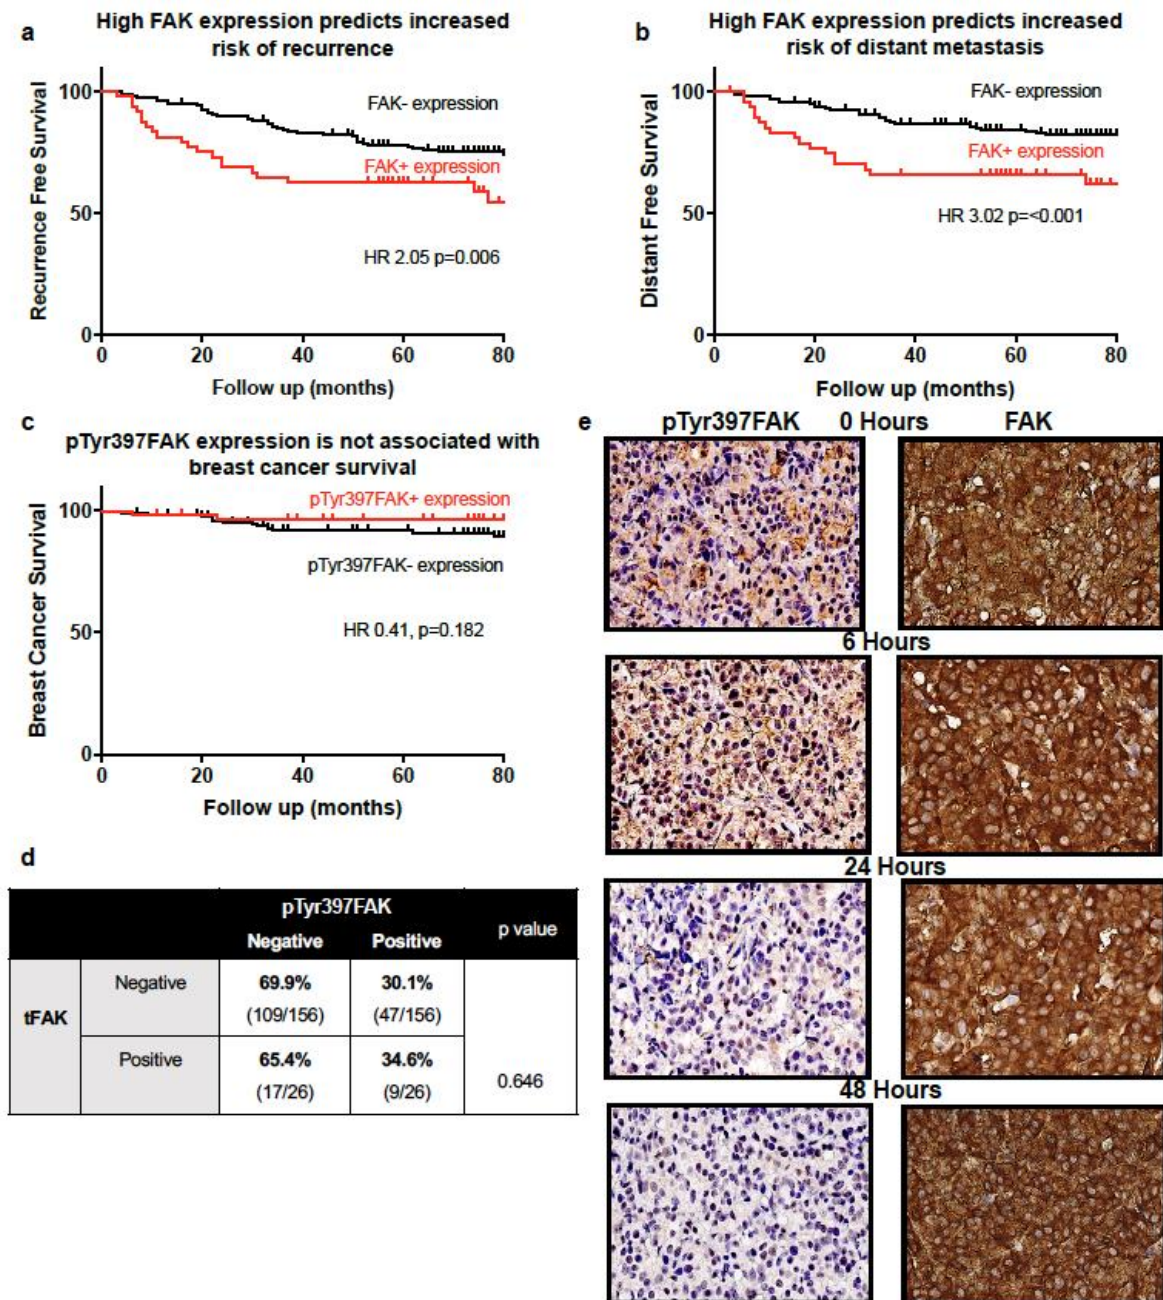

**(a)** Kaplan-Meier demonstrating that high FAK is associated with an increased risk of recurrence HR 2.05 (1.23 -3.43, Cox-proportional regression p=0.006). **(b)** Kaplan-Meier demonstrating that high FAK is associated with an increased risk of metastasis HR 3.02 (1.65-5.49, Cox-proportional regression p = <0.001). **(c)** Kaplan-Meier demonstrating epithelial pTyr397FAK does not predict breast cancer survival in our cohort. HR 0.41 (0.12-1.51, Cox proportional regression p=0.182). **(d)** Further analysis demonstrating no association between FAK and pTyr397FAK IHC staining with a

Kappa agreement of 0.03 and p value of 0.646. Tumours harvested from a PDX with high pTyr397FAK were then placed in media for 0, 6, 24 and 48 hours prior to fixation and processing. Photomicrographs taken at 40 x magnification demonstrate that **(e)** pTyr397FAK expression is lost with increasing time to fixation in the first column whilst the second column demonstrates that FAK expression does not change with increasing time to fixation.

Supplementary Figure 4: High ALDH1 and ITGa6 is associated with poor clinical outcome.

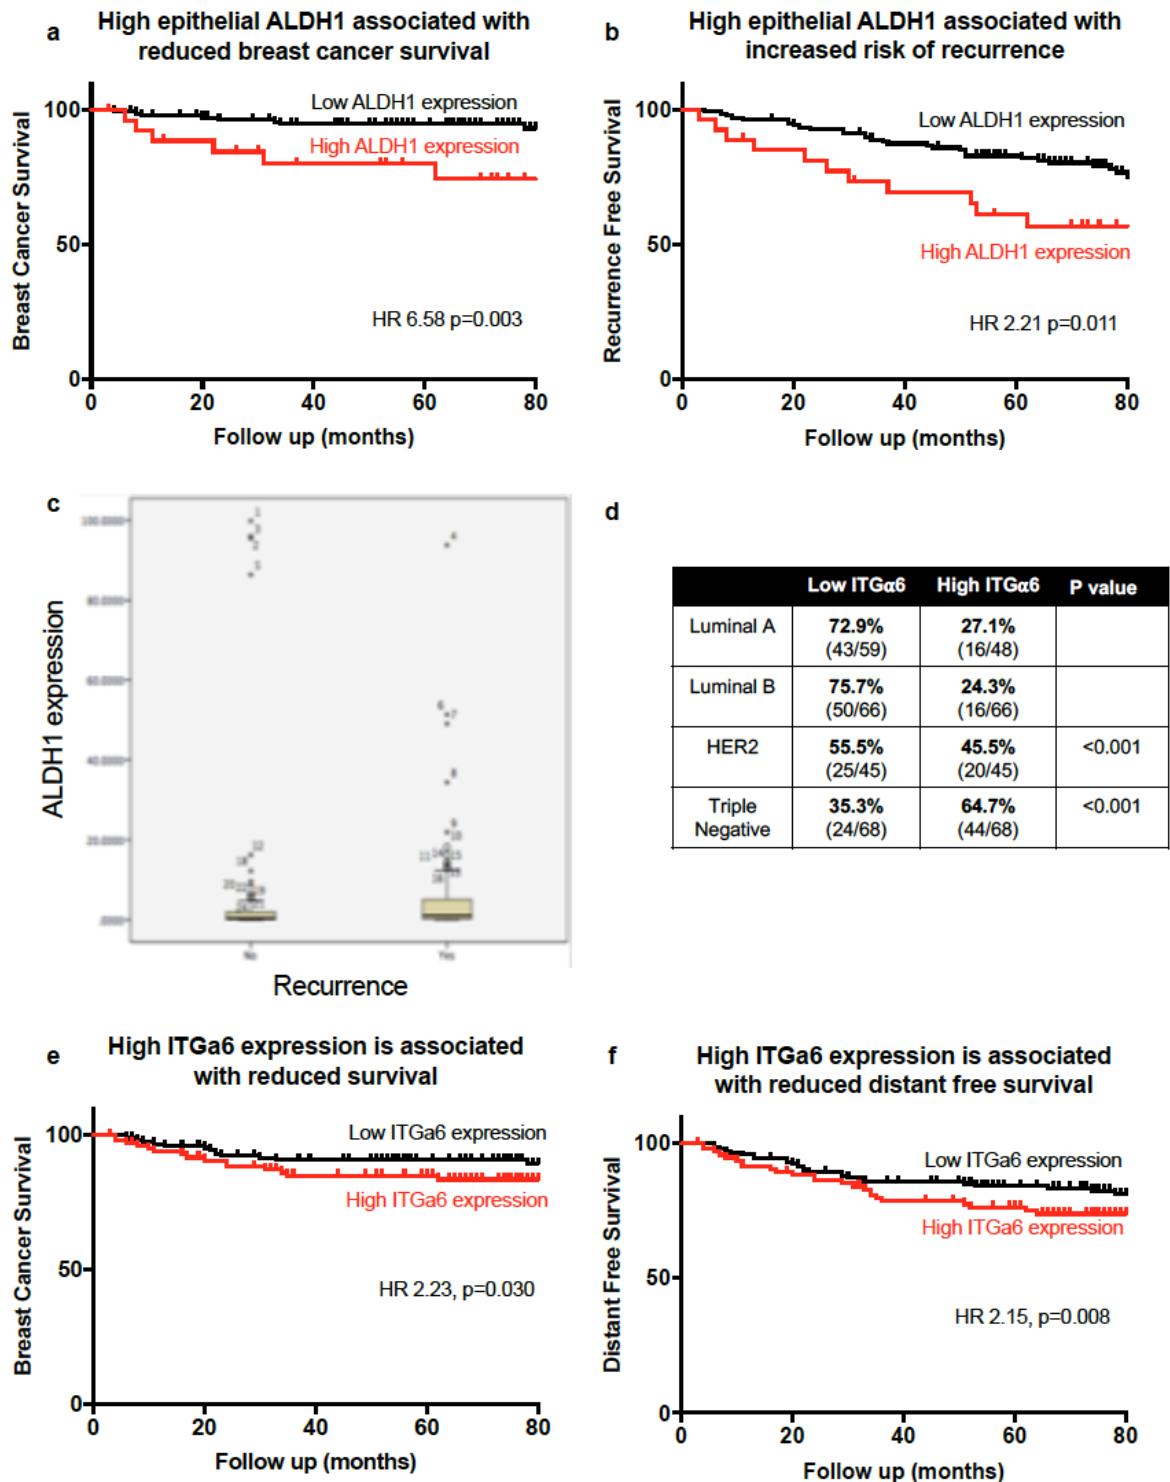

(a) Kaplan-Meier demonstrating that high epithelial ALDH1 expression is associated with poorer survival (n=165) HR 6.58, 1.87-23.10, p=0.003, cox-proportional hazard regression). (b) Kaplan-Meier demonstrating that high epithelial ALDH1 is associated with an increased risk of recurrence HR 2.21 (1.20-4.05, cox-proportional hazard regression, p=0.011). (c) Whisker plot demonstrating that any

epithelial ALDH1 expression is associated with an increased risk of recurrence. Average ALDH1 expression is 6.86% in recurrence samples as opposed to 4.99% in non-recurrence cohort ( $p=0.023$ , Mann-Whitney U test). **(d)** High ITG $\alpha$ 6 expression is associated with a triple negative phenotype. Chi square test used to evaluate expression between categorical variables. **(e)** Kaplan-Meier demonstrating that high ITG $\alpha$ 6 expression is associated with reduced breast cancer survival in our IDC cohort ( $n=232$ ) HR 2.23 (1.08-4.58, cox-proportional regression,  $p=0.030$ ). **(f)** Kaplan-Meier demonstrating that high ITG $\alpha$ 6 expression is associated with increased rate of metastasis. HR 2.16 (1.22-3.81, cox-proportional regression,  $p=0.008$ ).



## Supplementary Figure 5: An overview of PDX experiments

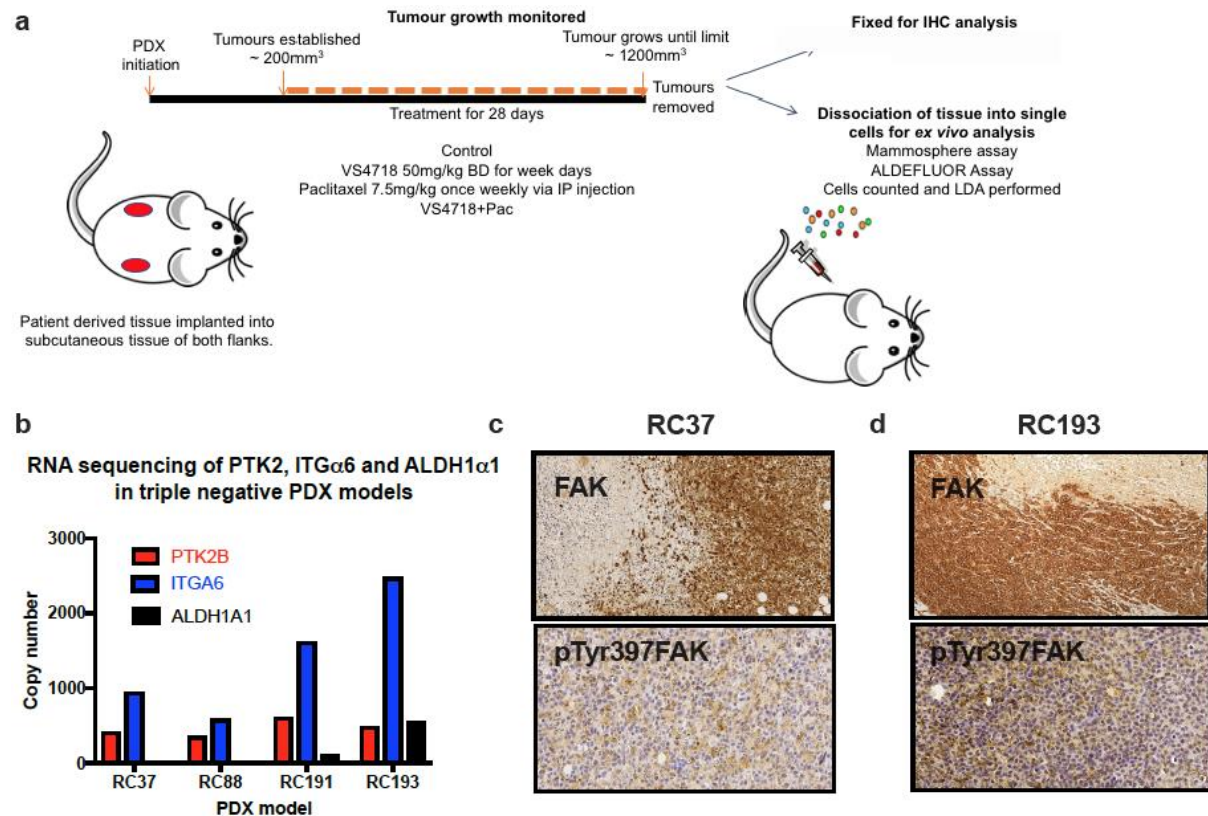

**(a)** Figure demonstrating how the PDX experiments were performed whereby chunks of fresh tissue from RC37 and RC193 are implanted into both flanks and treated for a maximum of 4 weeks whilst tumours are measured twice weekly and the daily when over 800mm<sup>3</sup>. In the control group mice received vehicle control via oral gavage and DMSO+PBS IP injections once weekly. In the chemotherapy only group 7.5mg/kg Paclitaxel was given via IP injection once weekly. In the FAK inhibitor only group VS4718 via oral gavage twice daily on week days. In the combined group mice received both the above treatments. **(b)** Relative RNA expression of PTK2 gene encoding for FAK, ITGα6 and ALDH1A1 in the triple negative PDX models available. Photomicrographs demonstrating that **(c)** RC37 and **(d)** 193 express moderate to high FAK. Top image of FAK taken at 10 x magnification and bottom of pTyr397 staining taken at 40 x magnification.

**Western blots included in Manuscript.**

Figure 1a) pFAK CST 8556

Ladder (kda) MCF10a DCIS.comMCF7 BT474 SKBr3 MDA-MB231 SUM159 Ladder

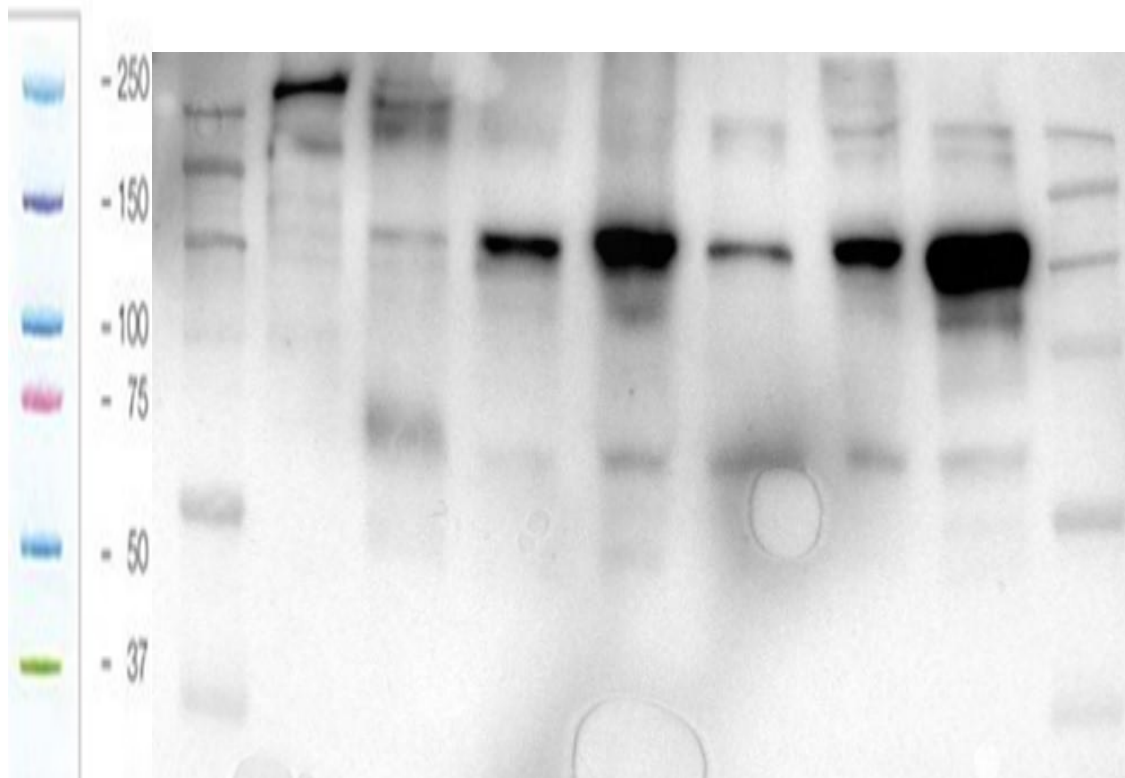

tFAK

Ladder MCF10a DCIS.comMCF7 BT474 SKBr3 MDA-MB231 SUM159 Ladder

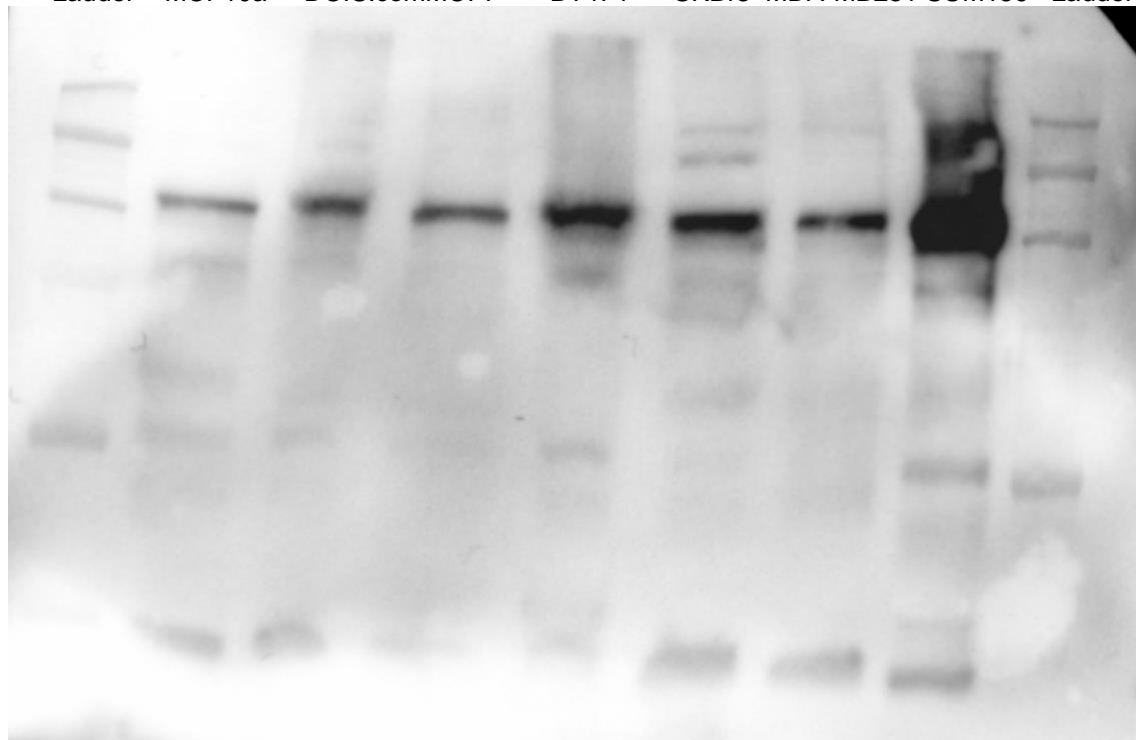

GAPDH

Ladder MCF10 DCIS.comMCF7 BT474 SKBr3 MDA-MB231 SUM159 Ladder

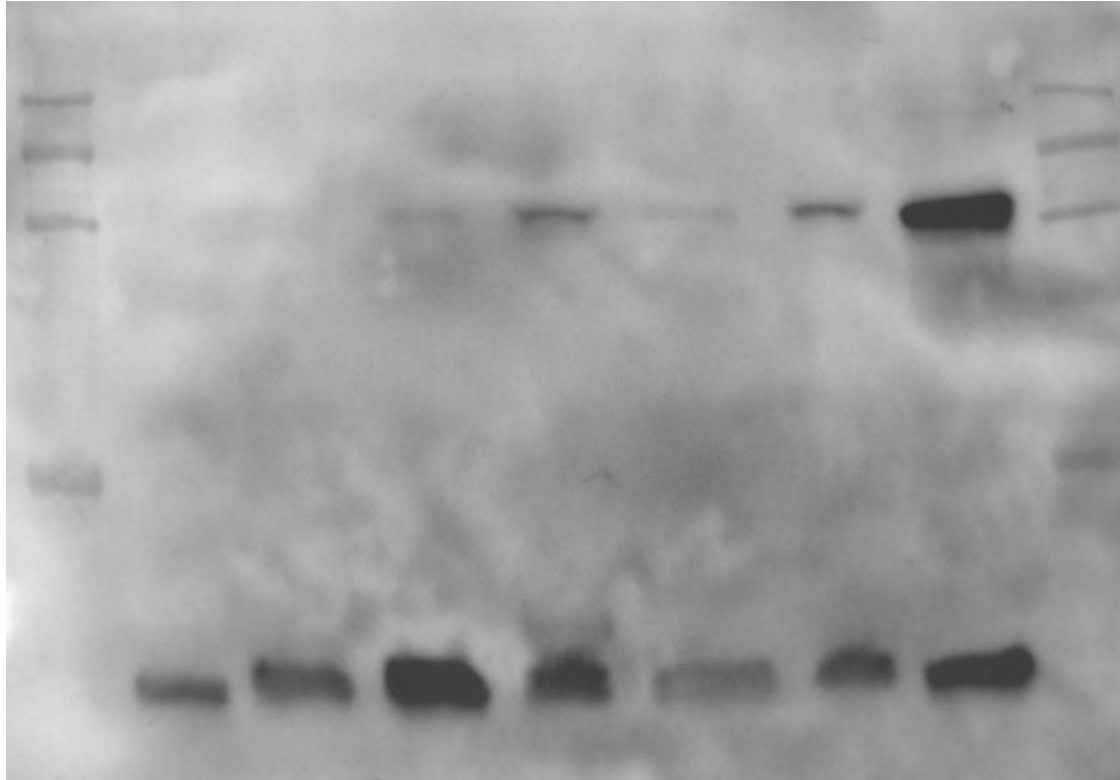

Figure 1c – ALDH flow sort

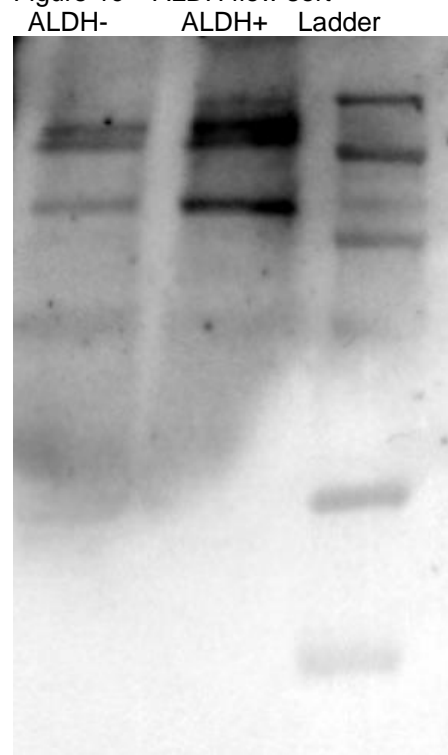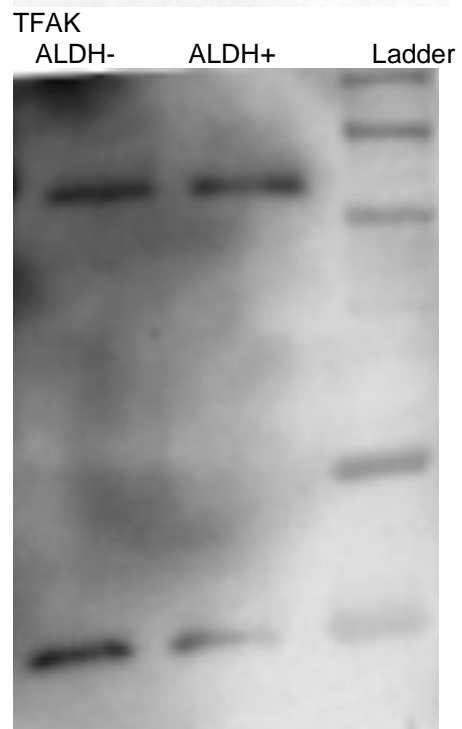

GAPDH  
ALDH-      ALDH+      Ladder

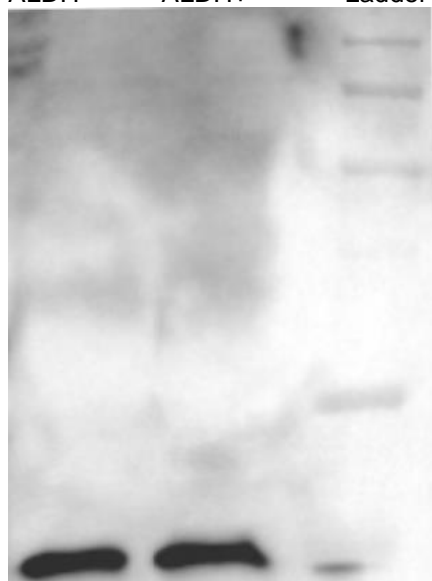

2a Time post 0.5 $\mu$ M Fig Figure 2A MDA MB 231 time course  
VS4718 (hours) – pFAK CST 8556

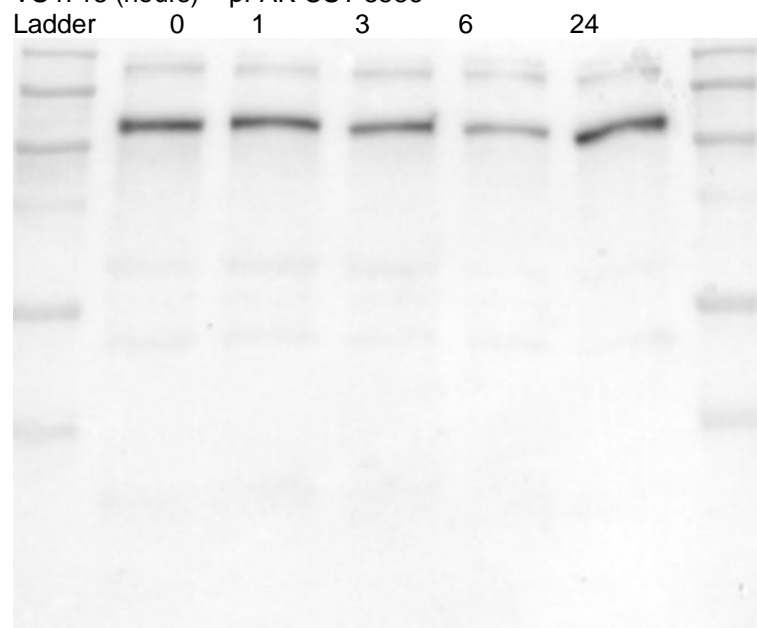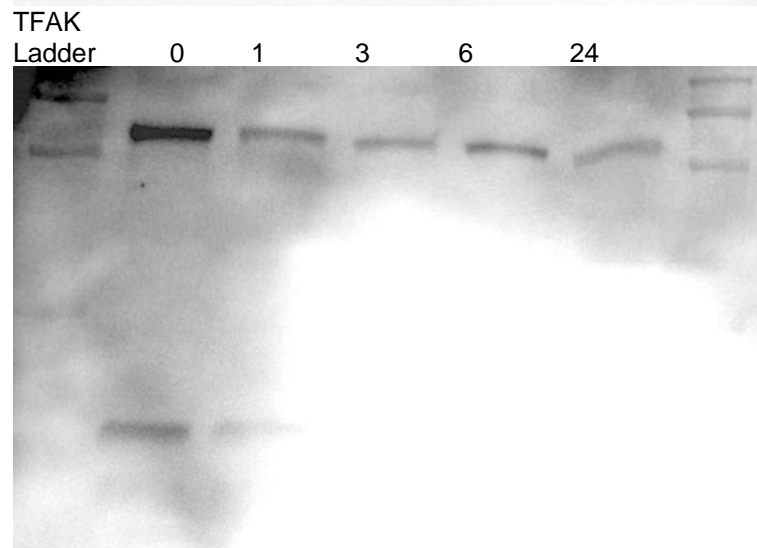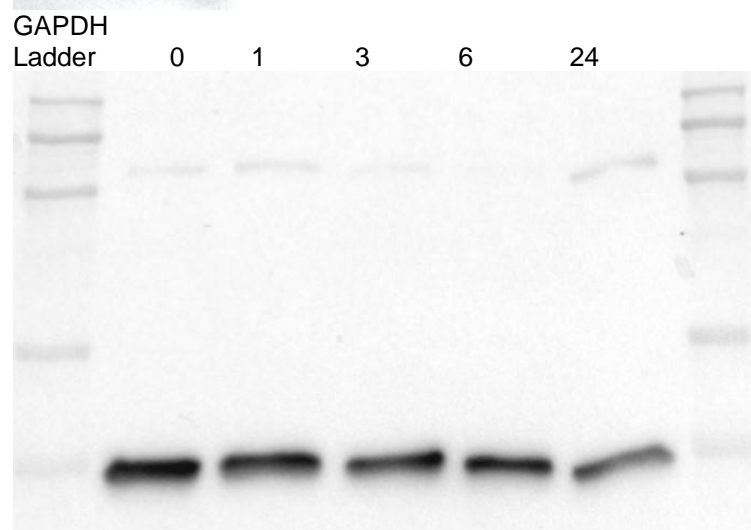

2C Dose response MDA-MB-231 cells

pFAK

Ladder 0 0.1 0.5 1 5

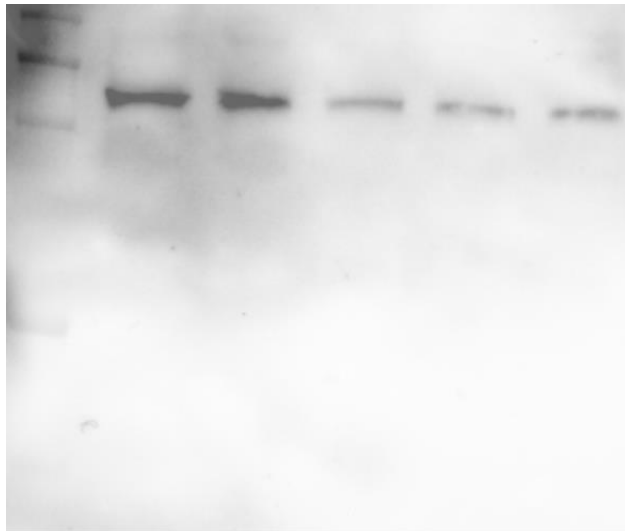

tFAK

Ladder 0 0.1 0.5 1 5

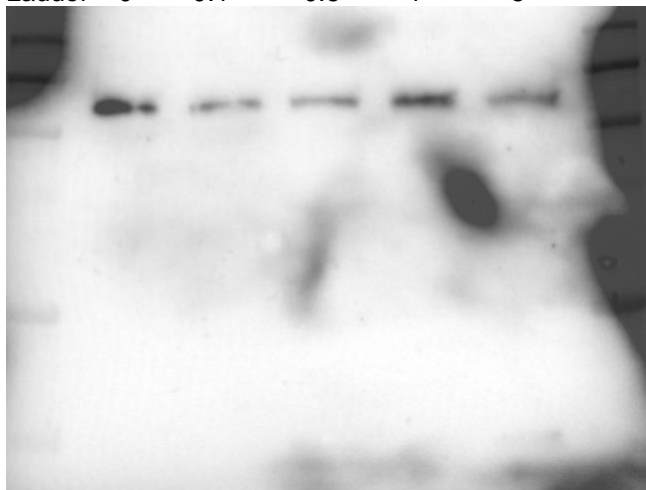

GAPDH

Ladder 0 0.1 0.5 1 5

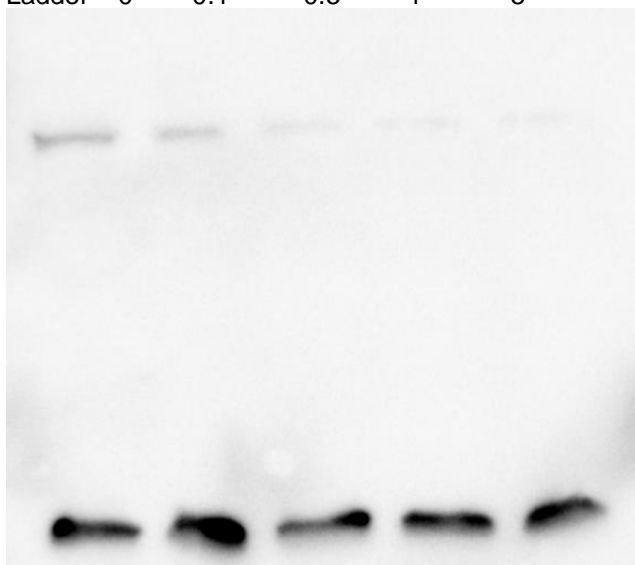

Unfortunately GAPDH doesn't have ladder but does appear to have remnants of pFAK staining above which corresponds.

2g SiRNA MDA-MB-231

tFAK

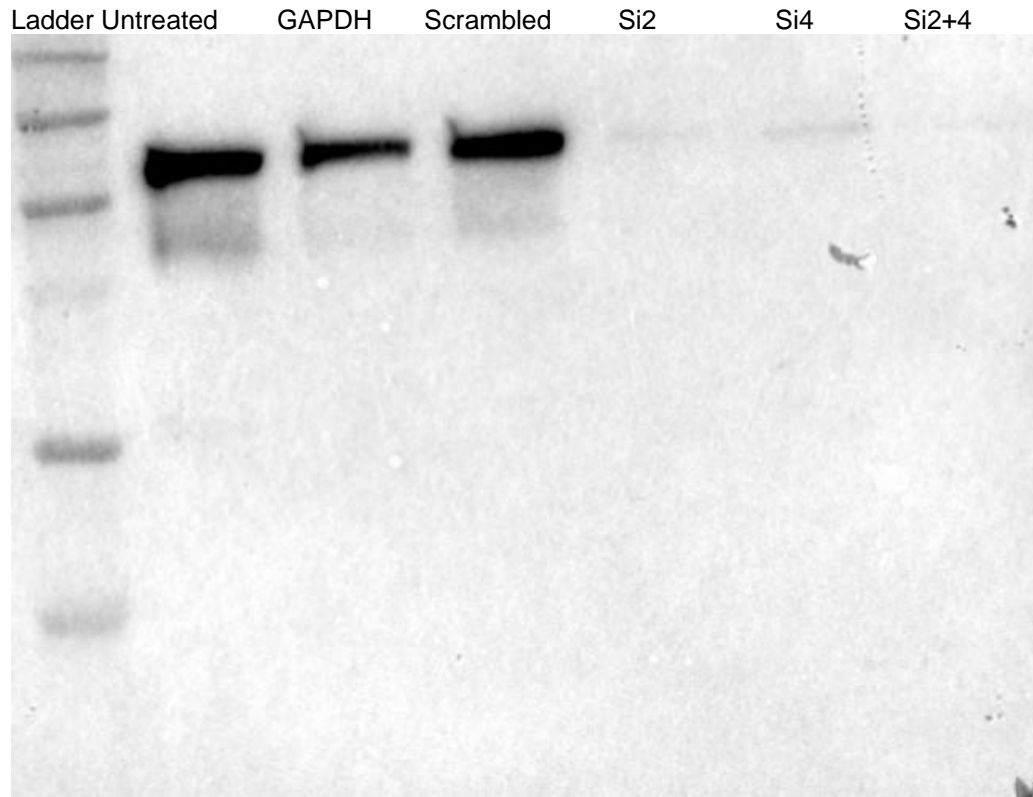

GAPDH

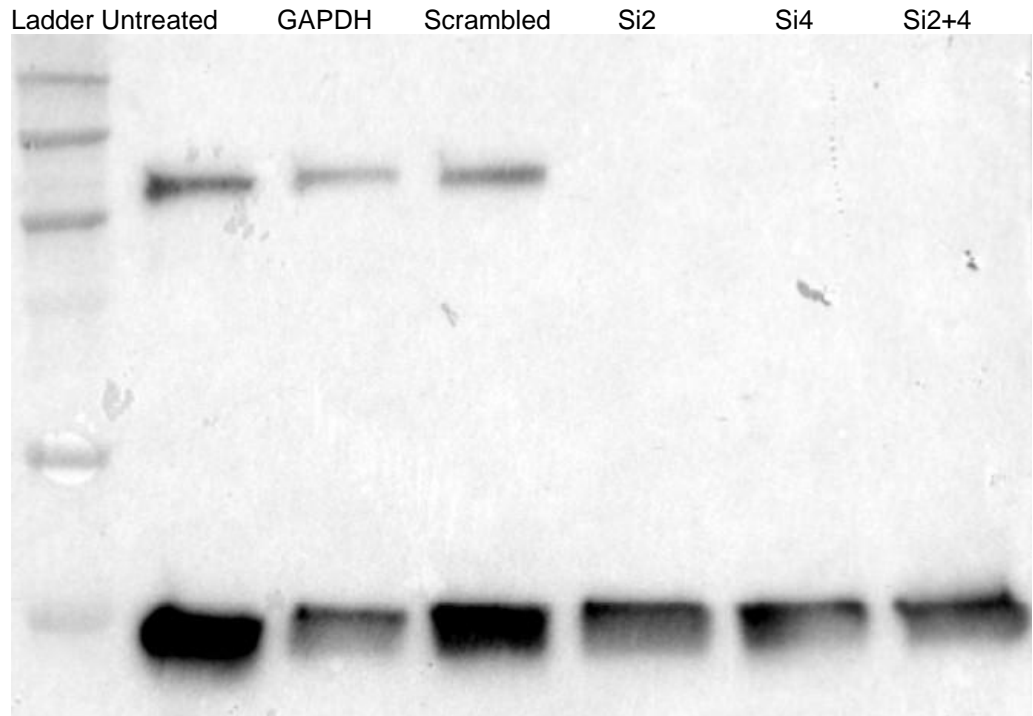



Supplementary figure 2a.  
Post VS4718 dose – pFAK in SUM159

Ladder 0 0.1 0.5 1 5

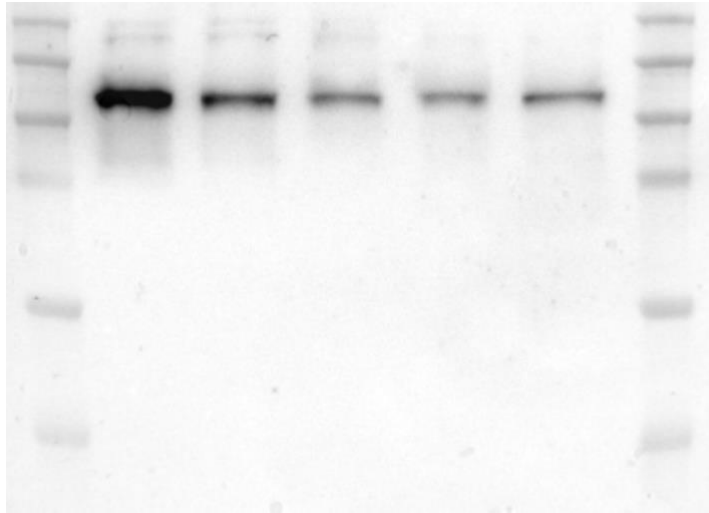

TFAK  
Ladder 0 0.1 0.5 1 5

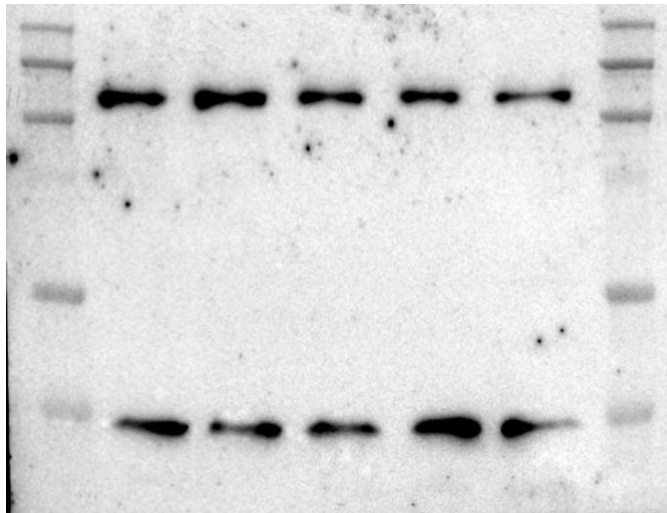

GAPDH – no ladder but it is there above where there is also some GAPDH stain.  
0 0.1 0.5 1 5

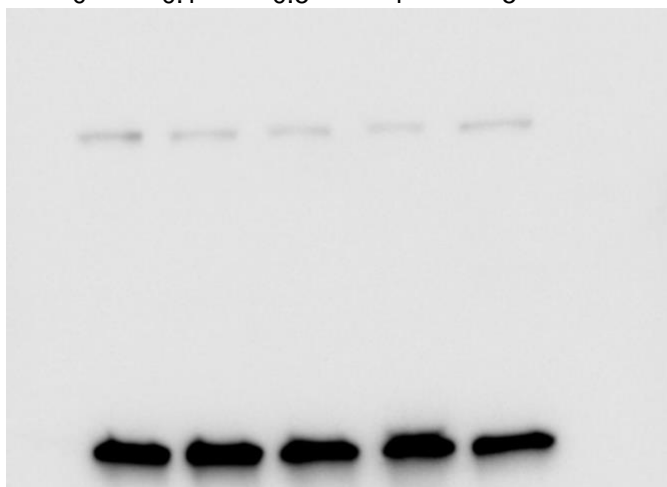

Supplementary figure 2d.

SUM159 – siRNA tFAK

Ladder Unrx Scr GAPDH Si2 Si 4 Si 2+4

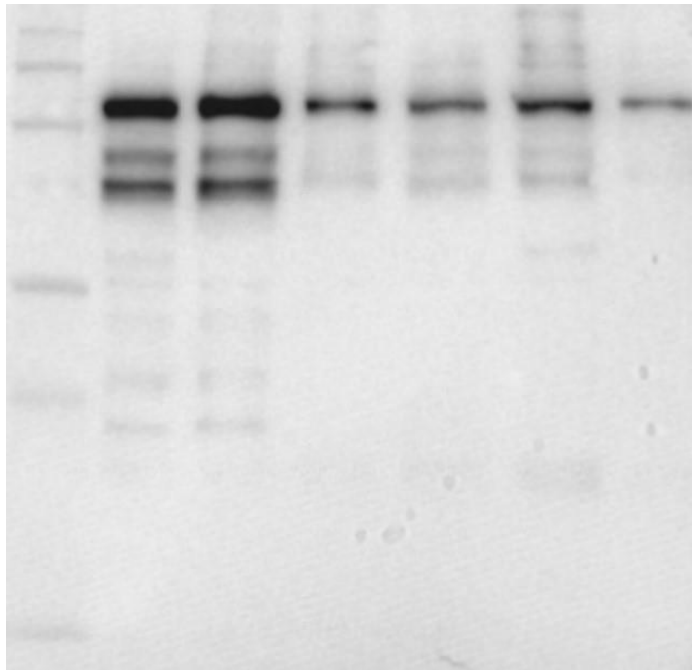

GAPDH

Ladder Unrx Scr GAPDH Si2 Si 4 Si 2+4

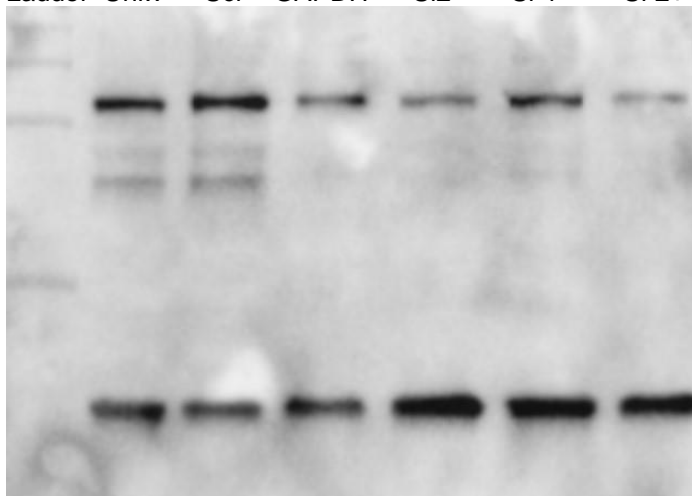

Note GAPDH column (3) wasn't in paper but can add. However, can't do comparative density plots as only have n =1 for it compared to n=3 for others.
